# Supplementary material
Source: Springer Nature journal article supplement (https://www.springermedizin.de/resource/supplementary/12889_2013_6357_MOESM2_ESM.pdf/9497670)

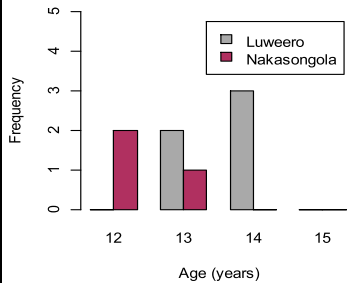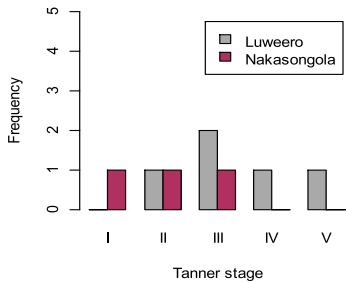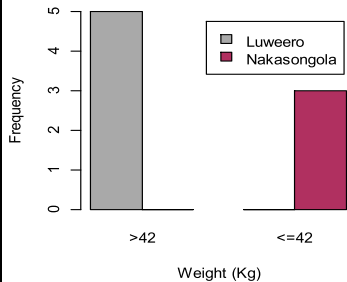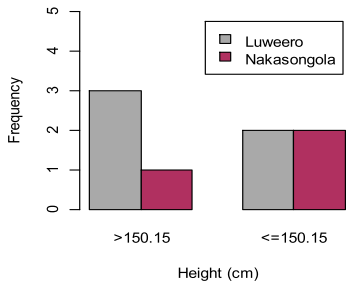

Supplement: MOESM2 [file 9497670]
